Searching for  
the perfect  
psychiatric  
career?

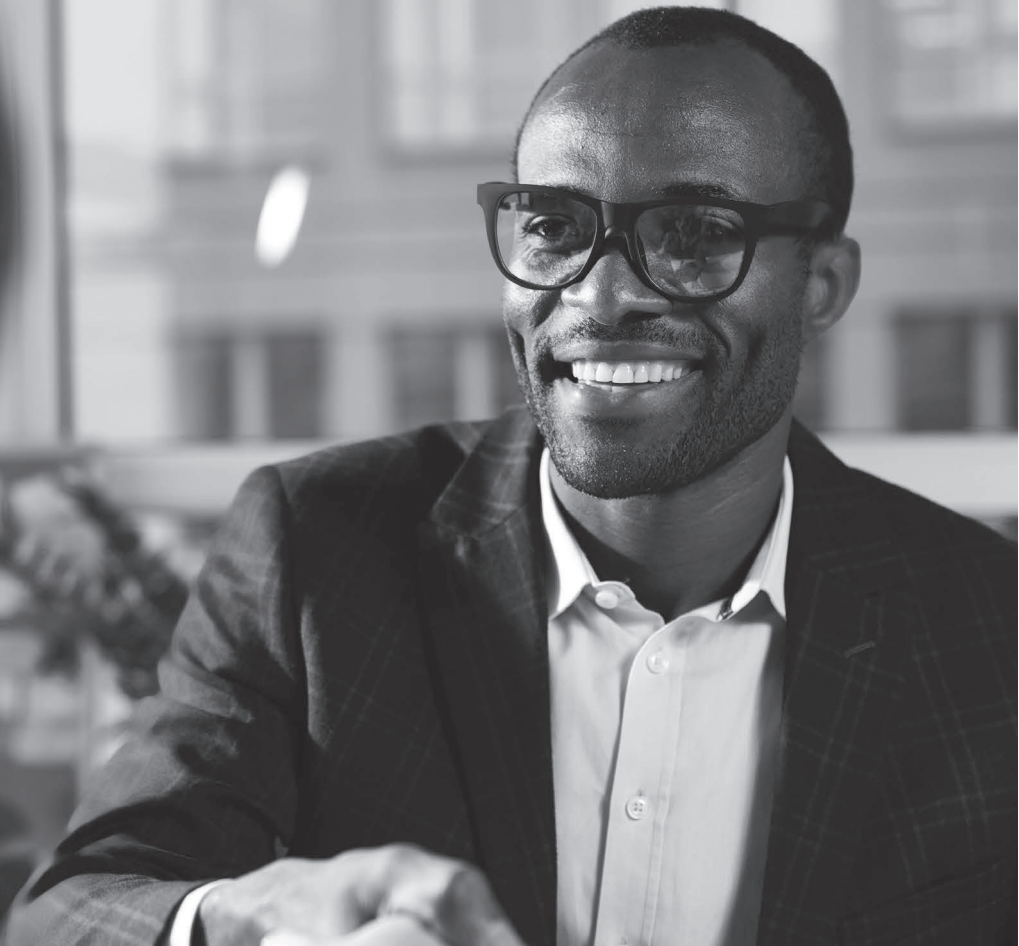

## Let APA JobCentral help!

### Manage Your Career

- Browse hundreds of active job listings!
- Create an account to save jobs, store multiple resumes and cover letters and communicate with employers through our internal messaging system.
- Set up multiple job alerts specifying your skills, interests and location to receive e-mails when employers post jobs that match your criteria.

### Recruit for Open Positions

- Post your job in front of thousands of highly qualified psychiatrists.
- Cross promote your job listing in Psychiatric News.
- Search the anonymous resume database to find your ideal candidate.

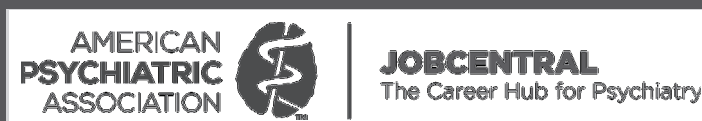

[jobs.psychiatry.org](http://jobs.psychiatry.org)

**Statement of Ownership, Management, and Circulation**  
**PS Form 3526 (All Periodicals Publications Except Requester Publications)**

|                                                                                                                                                                                                                                                                                                                                                                                                                                                                                                                                                                         |  |                                                                                 |                  |                                                             |
|-------------------------------------------------------------------------------------------------------------------------------------------------------------------------------------------------------------------------------------------------------------------------------------------------------------------------------------------------------------------------------------------------------------------------------------------------------------------------------------------------------------------------------------------------------------------------|--|---------------------------------------------------------------------------------|------------------|-------------------------------------------------------------|
| 1. Publication Title<br>AMERICAN PSYCHIATRIC PUBLISHING INC/<br>FOCUS                                                                                                                                                                                                                                                                                                                                                                                                                                                                                                   |  | 2. Publication Number<br>21577                                                  | ISSN<br>15414094 | 3. Filing Date<br>09/27/2021                                |
| 4. Issue Frequency<br>QUARTERLY                                                                                                                                                                                                                                                                                                                                                                                                                                                                                                                                         |  | 5. Number of Issues Published Annually<br>4                                     |                  | 6. Annual Subscription Price<br>\$ 690.00                   |
| 7. Complete Mailing Address of Known Office of Publication<br>800 MAINE AVE SW STE 900<br>WASHINGTON, ARLINGTON, DC 20024-2812                                                                                                                                                                                                                                                                                                                                                                                                                                          |  |                                                                                 |                  | Contact Person<br>BRYAN COLE<br>Telephone<br>(202) 459-9750 |
| 8. Complete Mailing Address of Headquarters or General Business Office of Publisher<br>800 Main Avenue, Suite 900<br>Washington, DC 20024                                                                                                                                                                                                                                                                                                                                                                                                                               |  |                                                                                 |                  |                                                             |
| 9. Full Names and Complete Mailing Addresses of Publisher, Editor, and Managing Editor                                                                                                                                                                                                                                                                                                                                                                                                                                                                                  |  |                                                                                 |                  |                                                             |
| Publisher (Name and complete mailing address)<br>John McDuffie<br>800 Main Avenue, Suite 900<br>Washington, DC 20024                                                                                                                                                                                                                                                                                                                                                                                                                                                    |  |                                                                                 |                  |                                                             |
| Editor (Name and complete mailing address)<br>Mark Hyman Report, M.D.<br>800 Main Avenue, Suite 900<br>Washington, DC 20024                                                                                                                                                                                                                                                                                                                                                                                                                                             |  |                                                                                 |                  |                                                             |
| Managing Editor (Name and complete mailing address)<br>Demarie S. Jackson<br>800 Main Avenue, Suite 900<br>Washington, DC 20024                                                                                                                                                                                                                                                                                                                                                                                                                                         |  |                                                                                 |                  |                                                             |
| 10. Owner (Do not leave blank. If the publication is owned by a corporation, give the name and address of the corporation immediately followed by the names and addresses of all stockholders owning or holding 1 percent or more of the total amount of stock. If not owned by a corporation, give names and addresses of the individual owners. If owned by a partnership or other unincorporated firm, give its name and address as well as those of each individual owner. If the publication is published by a nonprofit organization, give its name and address.) |  |                                                                                 |                  |                                                             |
| Full Name<br>American Psychiatric Assoc.                                                                                                                                                                                                                                                                                                                                                                                                                                                                                                                                |  | Complete Mailing Address<br>800 MAINE AVE SW STE 900, WASHINGTON, DC 20024-2812 |                  |                                                             |
| American Psychiatric Assoc.                                                                                                                                                                                                                                                                                                                                                                                                                                                                                                                                             |  | 800 Main Avenue, Suite 900, Washington, DC 20024                                |                  |                                                             |
| 11. Known Bondholders, Mortgagees, and Other Security Holders Owning or Holding 1 Percent or More of Total Amount of Bonds, Mortgages, or Other Securities. If none, check box <input checked="" type="checkbox"/> None                                                                                                                                                                                                                                                                                                                                                 |  |                                                                                 |                  |                                                             |
| Full Name                                                                                                                                                                                                                                                                                                                                                                                                                                                                                                                                                               |  | Complete Mailing Address                                                        |                  |                                                             |

PS Form 3526, September 2007 (Page 1)

PRIVACY NOTICE: See our privacy policy on www.usps.com

|                                                                                                                                                                                                                                                                                          |                                                                                                                                                                    |                                                          |                                                             |
|------------------------------------------------------------------------------------------------------------------------------------------------------------------------------------------------------------------------------------------------------------------------------------------|--------------------------------------------------------------------------------------------------------------------------------------------------------------------|----------------------------------------------------------|-------------------------------------------------------------|
| 13. Publication Title<br>AMERICAN PSYCHIATRIC PUBLISHING INC/FOCUS                                                                                                                                                                                                                       |                                                                                                                                                                    | 14. Issue Date for Circulation Data Below<br>08/01/2021  |                                                             |
| 15. Extend and Nature of Circulation                                                                                                                                                                                                                                                     |                                                                                                                                                                    | Average No. Copies Each Issue During Preceding 12 Months | No. Copies of Single Issue Published Nearest to Filing Date |
| a. Total Numbers of Copies (Net press run)                                                                                                                                                                                                                                               |                                                                                                                                                                    | 1590                                                     | 1431                                                        |
| b. Paid Circulation (By Mail and Outside the Mail)                                                                                                                                                                                                                                       | (1) Mailed Outside County Paid Subscriptions Stated on PS Form 3541 (include paid distribution above nominal rate, advertiser's proof copies, and exchange copies) | 1241                                                     | 1152                                                        |
|                                                                                                                                                                                                                                                                                          | (2) Mailed In-County Paid Subscriptions Stated on PS Form 3541 (include paid distribution above nominal rate, advertiser's proof copies, and exchange copies)      | 0                                                        | 0                                                           |
|                                                                                                                                                                                                                                                                                          | (3) Paid Distribution Outside the Mails Including Sales Through Dealers and Carriers, Street Vendors, Counter Sales, and Other Paid Distribution Outside USPS      | 49                                                       | 45                                                          |
|                                                                                                                                                                                                                                                                                          | (4) Paid Distribution by Other Classes of Mail Through the USPS (e.g. First-Class Mail)                                                                            | 0                                                        | 0                                                           |
| c. Total Paid Distribution (Sum of 15b (1), (2), (3), (4))                                                                                                                                                                                                                               |                                                                                                                                                                    | 1290                                                     | 1197                                                        |
| d. Free or Nominal Rate Distribution (By Mail and Outside the Mail)                                                                                                                                                                                                                      | (1) Free or Nominal Rate Outside County Copies included on PS Form 3541                                                                                            | 0                                                        | 0                                                           |
|                                                                                                                                                                                                                                                                                          | (2) Free or Nominal Rate In-County Copies included on PS Form 3541                                                                                                 | 0                                                        | 0                                                           |
|                                                                                                                                                                                                                                                                                          | (3) Free or Nominal Rate Copies Mailed at Other Classes Through the USPS (e.g. First-Class Mail)                                                                   | 0                                                        | 0                                                           |
|                                                                                                                                                                                                                                                                                          | (4) Free or Nominal Rate Distribution Outside the Mail (Carriers or other means)                                                                                   | 80                                                       | 79                                                          |
| e. Total Free or Nominal Rate Distribution (Sum of 15d (1), (2), (3), (4))                                                                                                                                                                                                               |                                                                                                                                                                    | 80                                                       | 79                                                          |
| f. Total Distribution (Sum of 15c and 15e)                                                                                                                                                                                                                                               |                                                                                                                                                                    | 1370                                                     | 1276                                                        |
| g. Copies not Distributed                                                                                                                                                                                                                                                                |                                                                                                                                                                    | 0                                                        | 0                                                           |
| h. Total (Sum of 15f and 15g)                                                                                                                                                                                                                                                            |                                                                                                                                                                    | 1370                                                     | 1276                                                        |
| i. Percent Paid ((15c / 15f) times 100)                                                                                                                                                                                                                                                  |                                                                                                                                                                    | 94.16 %                                                  | 93.81 %                                                     |
| 16. If total circulation includes electronic copies, report that circulation on lines below.                                                                                                                                                                                             |                                                                                                                                                                    |                                                          |                                                             |
| a. Paid Electronic Copies                                                                                                                                                                                                                                                                |                                                                                                                                                                    | 0                                                        | 0                                                           |
| b. Total Paid Print Copies (Line 15c) + Paid Electronic Copies                                                                                                                                                                                                                           |                                                                                                                                                                    | 0                                                        | 0                                                           |
| c. Total Print Distribution (Line 15f) + Paid Electronic Copies                                                                                                                                                                                                                          |                                                                                                                                                                    | 0                                                        | 0                                                           |
| d. Percent Paid (Both Print and Electronic Copies)                                                                                                                                                                                                                                       |                                                                                                                                                                    | 0.00 %                                                   | 0.00 %                                                      |
| <input type="checkbox"/> I certify that 50% of all my distributed copies (Electronic and Print) are paid above a nominal price.                                                                                                                                                          |                                                                                                                                                                    |                                                          |                                                             |
| 17. Publication of Statement of Ownership<br><input checked="" type="checkbox"/> If the publication is a general publication, publication of this statement is required. Will be printed in the 11/01/2021 issue of this publication. <input type="checkbox"/> Publication not required. |                                                                                                                                                                    |                                                          |                                                             |
| 18. Signature and Title of Editor, Publisher, Business Manager, or Owner<br>Debra Eubanks                                                                                                                                                                                                |                                                                                                                                                                    | Title<br>Director, Publishing Business Operations        | Date<br>09/27/2021 15:53:09 PM                              |

PS Form 3526, September 2007 (Page 2)

PRIVACY NOTICE: See our privacy policy on www.usps.com

# Understanding Mental Disorders

## Your Guide to DSM-5®

American Psychiatric Association

A consumer guide for anyone who has been touched by mental illness!

With Foreword by Patrick J. Kennedy

Most of us know someone who suffers from a mental illness. This book helps those who may be struggling with mental health problems, as well as those who want to help others achieve mental health and well-being.

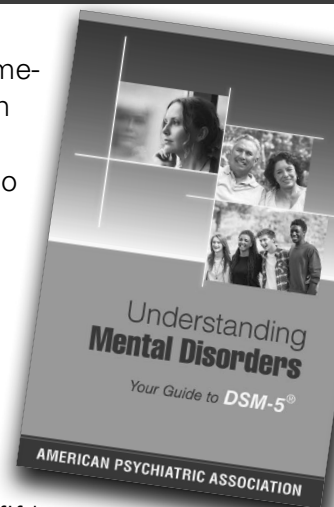

Based on the latest, fifth edition of the *Diagnostic and Statistical Manual of Mental Disorders*—known as DSM-5®—**Understanding Mental Disorders** provides valuable insight on what to expect from an illness and its treatment—and will help readers recognize symptoms, know when to seek help, and get the right care. Featured disorders include depression, schizophrenia, ADHD, autism spectrum disorder, posttraumatic stress disorder, and bipolar disorder, among others.

2015 • 388 pages • ISBN 978-1-58562-491-1  
Paperback • \$24.95 • Item #62491

AMERICAN  
PSYCHIATRIC  
ASSOCIATION  
PUBLISHING

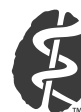

www.appi.org  
Phone: 703-907-7322  
Toll Free: 1-800-368-5777  
Email: appi@psych.org

20% Discount • American Psychiatric Association Members  
25% Discount • APA Resident-Fellow Members

AH1718
