WINTER 2022 | VOLUME 20 | NUMBER 1

# Focus

The Journal of Lifelong Learning in Psychiatry

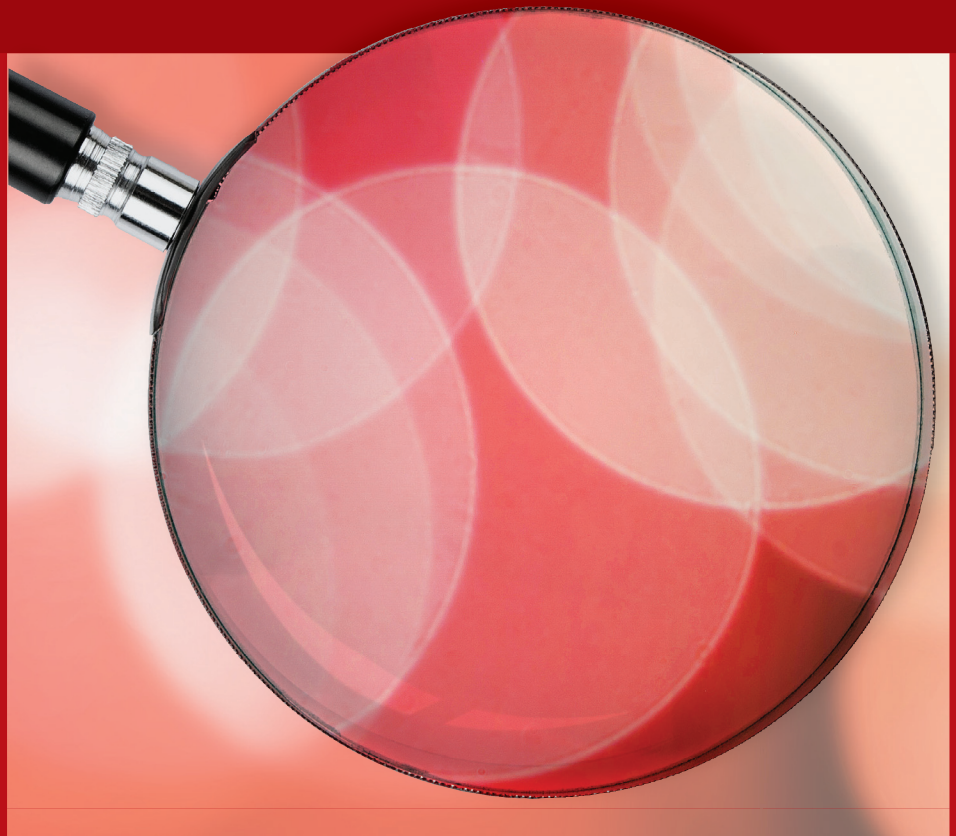

## Novel Neurotherapeutics

Guest Editor: Alexander Bystritsky, M.D., Ph.D.

AMERICAN  
PSYCHIATRIC  
ASSOCIATION

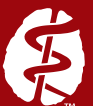

[focus.psychiatryonline.org](http://focus.psychiatryonline.org)
